# Supplementary material
Source: Royal Society of Chemistry journal article supplement (doi:10.1039/d6ay00766j)
Supplement: d6ay00766j1.pdf [file d6ay00766j1.pdf]

## **Development of a Green and Validated UHPLC-MS/MS Method for Assessing the Pharmacokinetics and Safety of PA-PEG<sub>12</sub>-PA in MCF-7 Cells**

<sup>a</sup> Jiale Liu<sup>a,b#</sup>, Chuya Wang<sup>a,b#</sup>, Meichen Liu<sup>a,b</sup>, Jiarui Zhang<sup>a,b</sup>, Xinyue Zhou<sup>a,b</sup>, Shuang Feng<sup>a,b</sup>, Yue Deng<sup>a,b</sup>, Yalin Xi<sup>a</sup>, Lei Yin<sup>a,b\*\*</sup>, Meiyun Shi<sup>a,b\*</sup>

<sup>a</sup> Central Hospital of Dalian University of Technology, Dalian University of Technology, Dalian, Liaoning 116023, P.R. China.

<sup>b</sup> School of Chemical Engineering, Ocean and Life Sciences, Dalian University of Technology, Panjin, P.R. China.

### **Corresponding Authors**

\*\*Lei Yin, School of Chemical Engineering, Ocean and Life Sciences, Dalian University of Technology, NO.2 Dagong Road, New District of Liaodong Bay, Panjin 124221; E-mails: [leiyin@dlut.edu.cn](mailto:leiyin@dlut.edu.cn)

\*Meiyun Shi, School of Chemical Engineering, Ocean and Life Sciences, Dalian University of Technology, NO.2 Dagong Road, New District of Liaodong Bay, Panjin 124221; E-mails: [shimy@dlut.edu.cn](mailto:shimy@dlut.edu.cn)

**Table S1.** Summary of validation parameters for the analytical method of PA-PEG<sub>12</sub>-PA.

| Parameters        | Description                                                                                                                                                                                       |
|-------------------|---------------------------------------------------------------------------------------------------------------------------------------------------------------------------------------------------|
| Selectivity       | The analytical method is capable of differentiating PA-PEG <sub>12</sub> -PA from endogenous components in the matrix or other constituents present in the sample.                                |
| Recovery          | Comparing peak areas of QC samples with those of post-extraction blank matrix spiked at corresponding concentrations.                                                                             |
| Matrix effect     | Compare the peak areas of PA-PEG <sub>12</sub> -PA and IS in the precipitated protein spiked sample with those in standard solutions.                                                             |
| Accuracy          | The mean concentration should be within 15% of the nominal values for the QC samples, except for the LLOQ which should be within 20% of the nominal values.                                       |
| Precision         | The CV value should not exceed 15% for the QC samples, except for the LLOQ which should not exceed 20%.                                                                                           |
| Stability         | Including room temperature storage stability (4 h at room temperature), autosampler stability (4 h at 4 °C), repeated freeze/thaw stability (3 cycles) and long-term stability (-30 °C for 15 d). |
| Calibration curve | At least six, non-zero calibrator levels covering the expected range, including LLOQ per analytical run.                                                                                          |

**Table S2.** The accuracies and precisions of PA-PEG<sub>12</sub>-PA (Mean  $\pm$  SD , n=18).

|                       | Low QC           | Medium QC        | High QC            |
|-----------------------|------------------|------------------|--------------------|
| Mean $\pm$ SD (ng/mL) | 11.02 $\pm$ 0.34 | 193.8 $\pm$ 7.90 | 396.39 $\pm$ 19.91 |
| R.E. (%)              | 10.22            | -3.08            | -0.90              |
| Intra-day CV (%)      | 1.87             | 2.49             | 1.40               |
| Inter-day CV (%)      | 7.41             | 9.73             | 14.13              |

**Table S3.** Recoveries and matrix effects of PA-PEG<sub>12</sub>-PA (Mean  $\pm$  SD , n=3).

|                    | Low QC            | Medium QC         | High QC           |
|--------------------|-------------------|-------------------|-------------------|
| Recoveries (%)     | 99.21 $\pm$ 2.17  | 103.05 $\pm$ 2.83 | 106.61 $\pm$ 5.96 |
| Matrix effects (%) | 107.27 $\pm$ 4.13 | 109.19 $\pm$ 1.96 | 103.67 $\pm$ 5.83 |

**Table S4.** Stability of PA-PEG<sub>12</sub>-PA under different conditions (Mean  $\pm$  SD , n=3).

| Nominal<br>Concentration<br>(ng/mL) | Storage at room<br>temperature for<br>4 h (%) | Storage at                                               |                               |                                      |
|-------------------------------------|-----------------------------------------------|----------------------------------------------------------|-------------------------------|--------------------------------------|
|                                     |                                               | Storage at<br>autosampler<br>vials (4 °C) for 4<br>h (%) | Freeze-thaw<br>(3 cycles) (%) | Storage at -30 °C<br>for 15 days (%) |
| 10                                  | 10.70 $\pm$ 0.66                              | 10.40 $\pm$ 0.88                                         | 10.18 $\pm$ 0.74              | 10.44 $\pm$ 0.89                     |
| 200                                 | 183.00 $\pm$ 10.15                            | 195.67 $\pm$ 4.04                                        | 194.00 $\pm$ 16.46            | 192.33 $\pm$ 2.08                    |
| 400                                 | 381.00 $\pm$ 3.61                             | 391.00 $\pm$ 6.56                                        | 389.33 $\pm$ 3.79             | 382.33 $\pm$ 10.26                   |

**Table S5.** The quantities of PA-PEG<sub>12</sub>-PA in MCF-7 cells. The quantities of PA-PEG<sub>12</sub>-PA were calculated by this formula:  $W (\%) = C_1 * V_1 * 10^{-6} / (1 * V_2) * 100\%$ .

| Time (h) | PA-PEG <sub>12</sub> -PA concentration in cells |       |       |       | Quantity of PA-PEG <sub>12</sub> -PA in cell (%)                             |          |          |          |
|----------|-------------------------------------------------|-------|-------|-------|------------------------------------------------------------------------------|----------|----------|----------|
|          | C <sub>1</sub> (ng/mL)                          |       |       |       | W=C <sub>1</sub> *V <sub>1</sub> *10 <sup>-6</sup> /(1*V <sub>2</sub> ) *100 |          |          |          |
|          | I                                               | II    | III   | mean  | I                                                                            | II       | III      | mean     |
| 0.5      | 6.54                                            | 6.07  | 5.19  | 5.93  | 1.64E-04                                                                     | 1.52E-04 | 1.30E-04 | 1.48E-04 |
| 1        | 9.91                                            | 10.20 | 8.43  | 9.51  | 2.48E-04                                                                     | 2.55E-04 | 2.11E-04 | 2.38E-04 |
| 2        | 12.00                                           | 9.44  | 13.20 | 11.55 | 3.00E-04                                                                     | 2.36E-04 | 3.30E-04 | 2.89E-04 |
| 4        | 13.40                                           | 16.30 | 13.40 | 14.37 | 3.35E-04                                                                     | 4.08E-04 | 3.35E-04 | 3.59E-04 |
| 8        | 11.90                                           | 19.40 | 16.80 | 16.03 | 2.98E-04                                                                     | 4.85E-04 | 4.20E-04 | 4.01E-04 |
| 12       | 41.00                                           | 22.30 | 24.70 | 29.33 | 1.03E-03                                                                     | 5.58E-04 | 6.18E-04 | 7.33E-04 |
| 24       | 28.60                                           | 38.70 | 39.80 | 35.70 | 7.15E-04                                                                     | 9.68E-04 | 9.95E-04 | 8.93E-04 |
| 36       | 43.40                                           | 22.00 | 34.60 | 33.33 | 1.09E-03                                                                     | 5.50E-04 | 8.65E-04 | 8.33E-04 |
| 48       | 25.40                                           | 17.90 | 35.50 | 26.27 | 6.35E-04                                                                     | 4.48E-04 | 8.88E-04 | 6.57E-04 |

“V<sub>1</sub>” in the table represents the volume of the cell sample, V<sub>1</sub>=0.5 mL;

“V<sub>2</sub>” in the table represents the total volume of PEG polymer administered to MCF-7 cells, V<sub>2</sub>=2 mL;

“1” in the table represents the concentration of PEG polymer administered to MCF-7 cells at 1 mg/mL ;

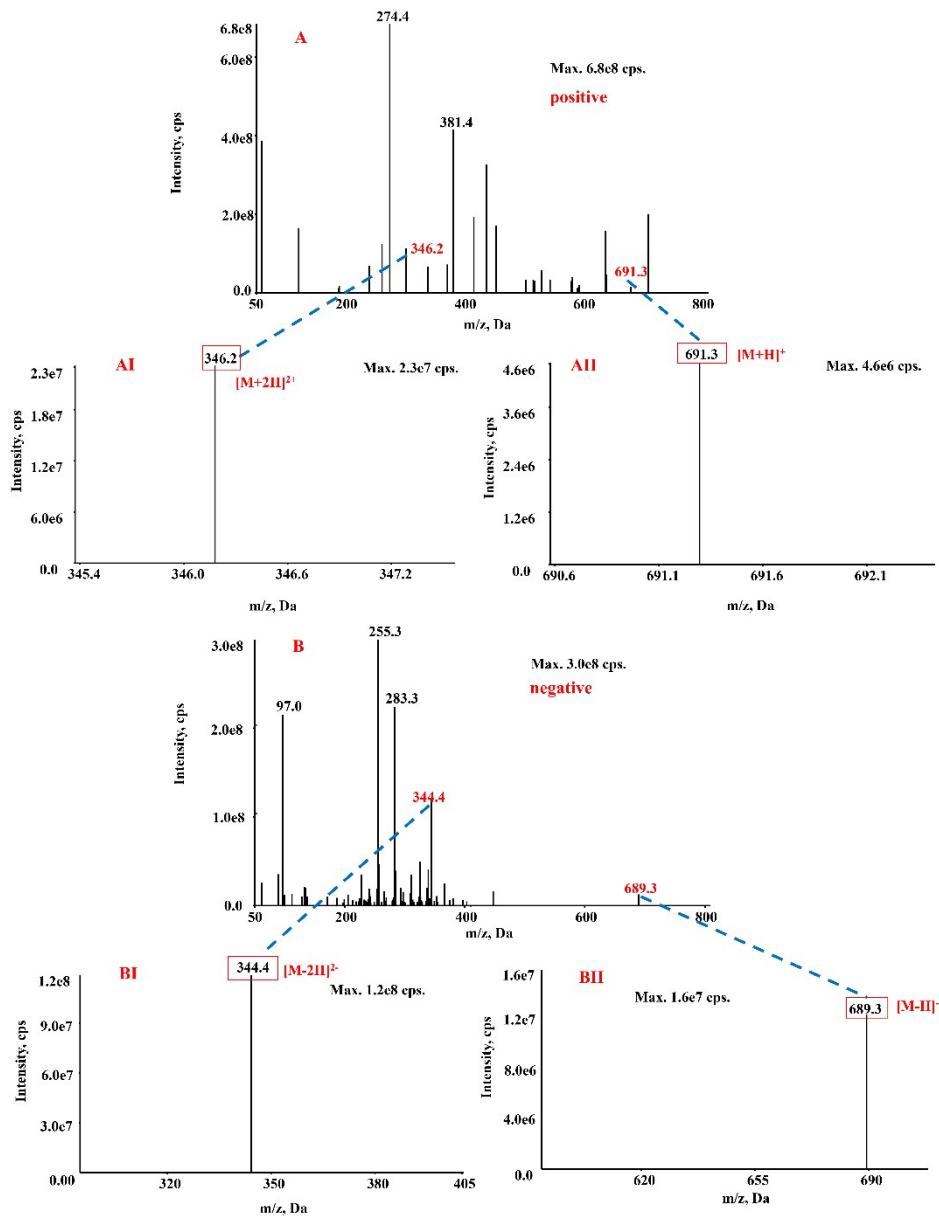

**Figure S1.** Comparison of the mass spectrometric response of PA-PEG<sub>12</sub>-PA in positive (A) and negative (B) ion modes. The key ions are as follows: Panel A (positive ion mode): (I) Doubly charged precursor ion [M+2H]<sup>2+</sup>, *m/z* 346.2; (II) Singly charged precursor ion [M+H]<sup>+</sup>, *m/z* 691.3. Panel B (negative ion mode): (I) Doubly charged precursor ion [M-2H]<sup>2-</sup>, *m/z* 344.4; (II) Singly charged precursor ion [M-H]<sup>-</sup>, *m/z* 689.3.

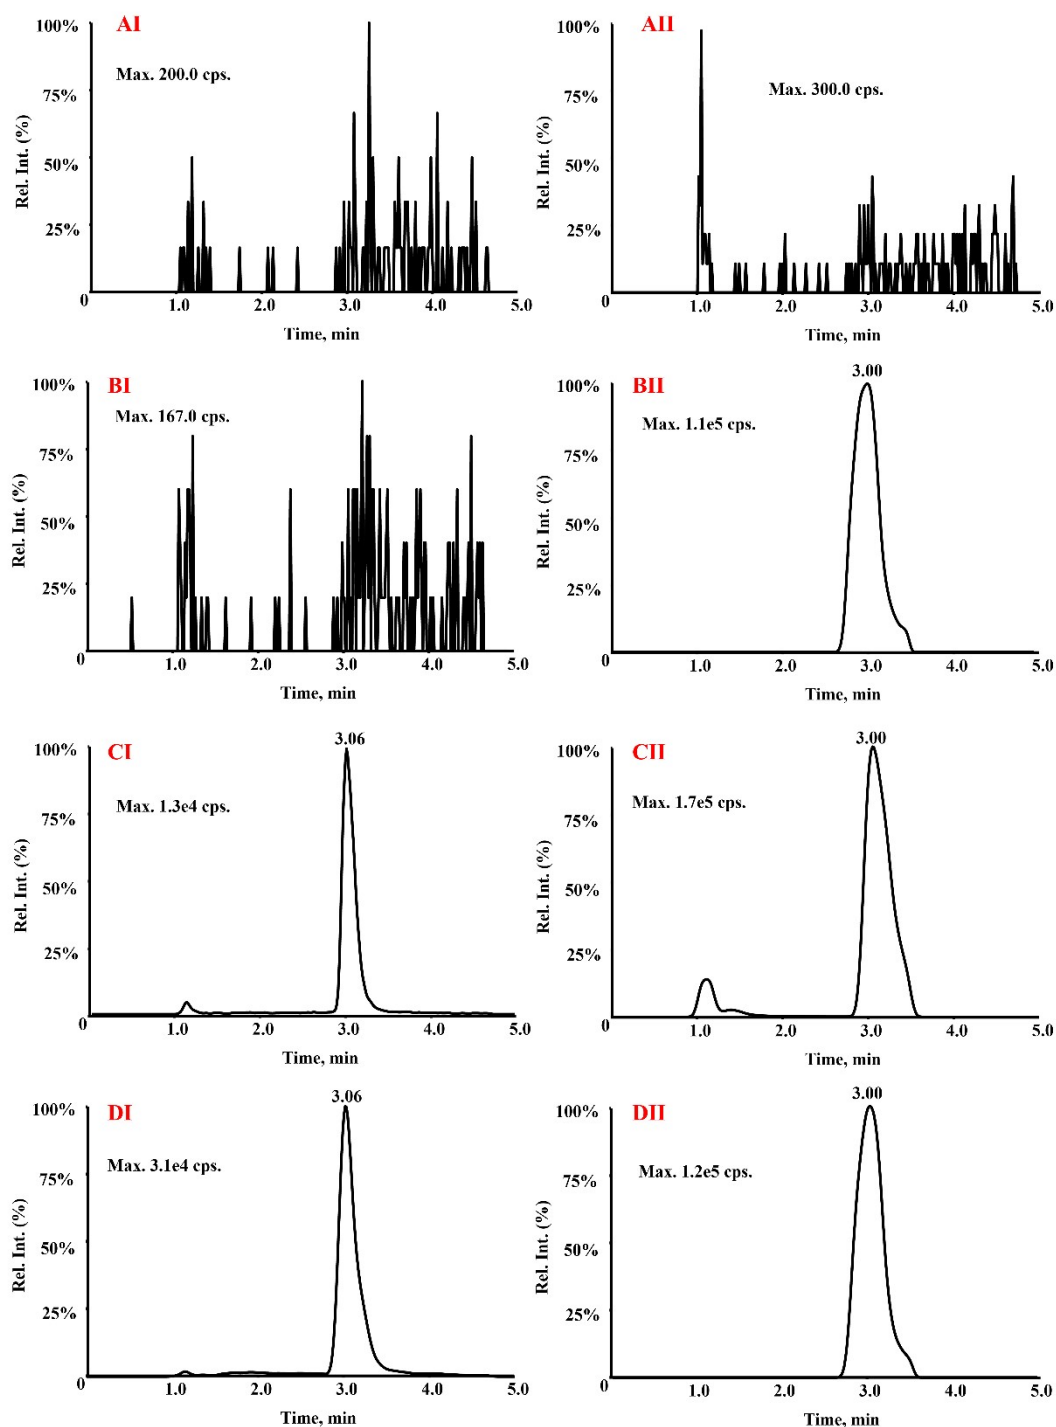

**Figure S2.** Representative UHPLC-MRM chromatograms of PA-PEG<sub>12</sub>-PA (I) and its internal standard M-PEG<sub>6</sub>-PA (II) obtained from (A) blank matrix, (B) blank matrix spiked with the internal standard (500 ng/mL), (C) blank matrix spiked with PA-PEG<sub>12</sub>-PA at the lower limit of quantification (5 ng/mL) and the internal standard (500 ng/mL), and (D) an actual MCF-7 cell sample.

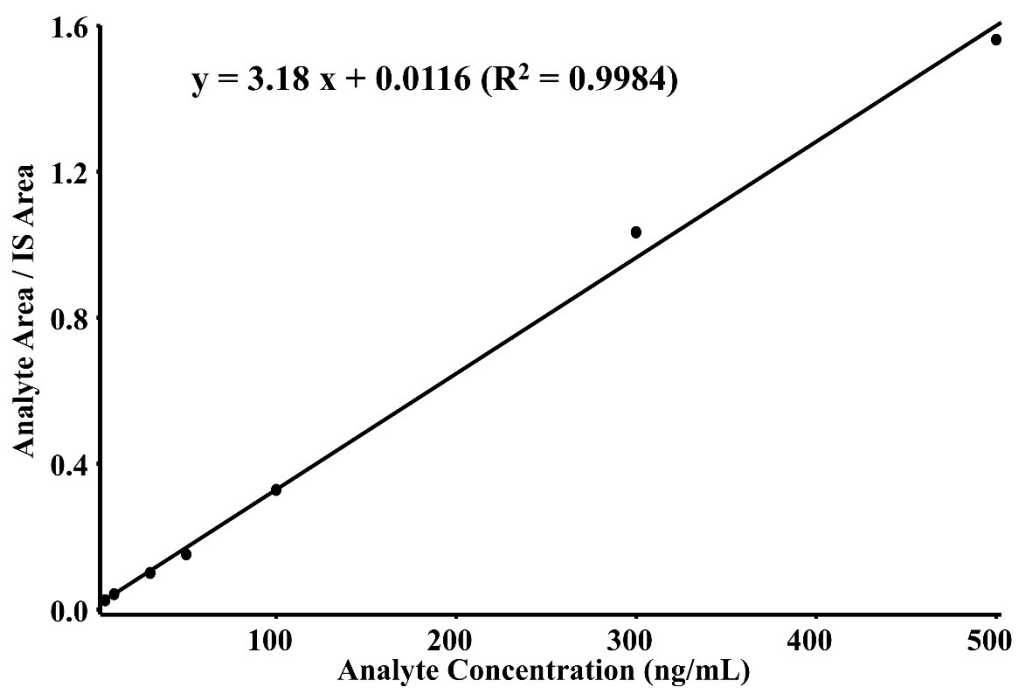

**Figure S3.** Representative standard curve regression of PA-PEG<sub>12</sub>-PA.

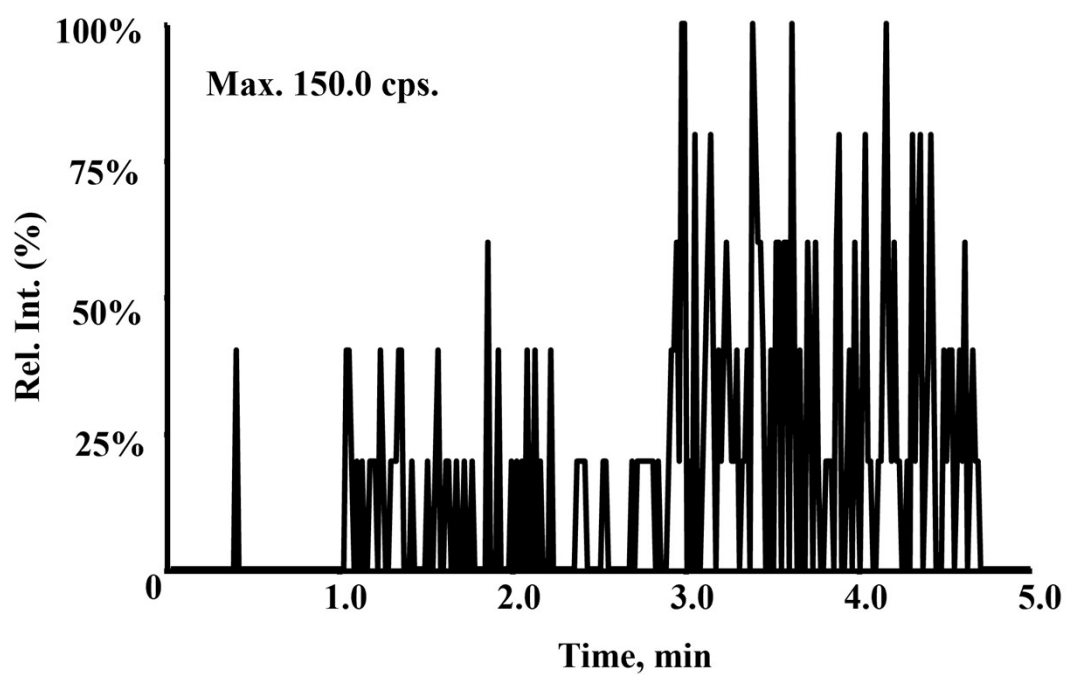

**Figure S4.** Representative UHPLC-MS/MS chromatogram of the supernatant from the second PBS rinse following cell washing.

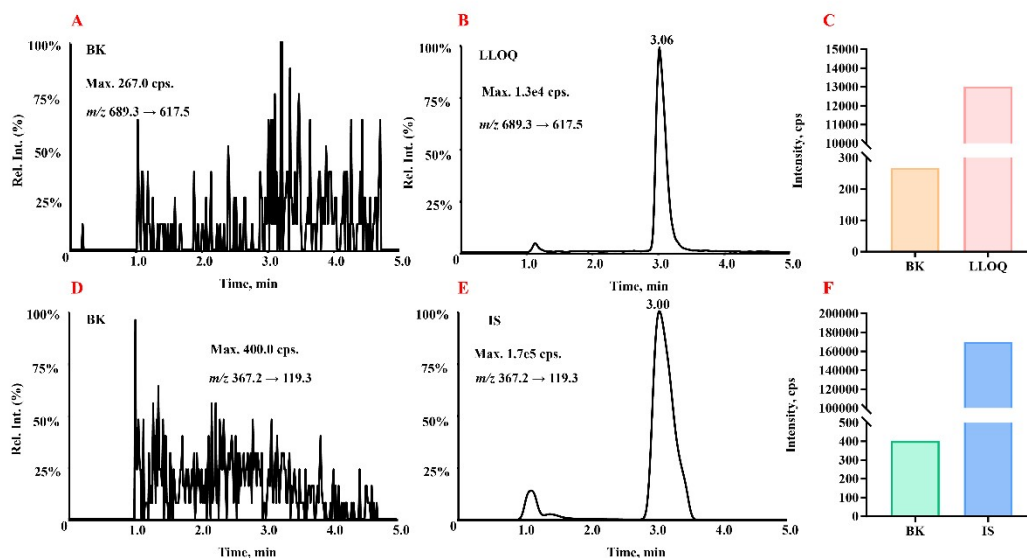

**Figure S5.** Evaluation of carry-over effect for PA-PEG<sub>12</sub>-PA and the internal standard (IS, M-PEG<sub>6</sub>-PA) using the UHPLC-MS<sup>2</sup> method. (A) PA-PEG<sub>12</sub>-PA of a blank matrix (BK) injected immediately after the upper limit of quantification (ULOQ, 500.0 ng/mL) for PA-PEG<sub>12</sub>-PA; (B) PA-PEG<sub>12</sub>-PA of the lower limit of quantification (LLOQ, 5 ng/mL) for PA-PEG<sub>12</sub>-PA; (C) Bar chart comparing the peak area responses of PA-PEG<sub>12</sub>-PA at LLOQ versus the post-ULOQ blank; (D) Chromatogram of a blank matrix injected after ULOQ for the IS; (E) Chromatogram of the IS; (F) Bar chart comparing the peak area responses of the IS versus the post-ULOQ blank.
